# Supplementary material
Source: PubMed Central journal article supplement (PMC3133100)

A.

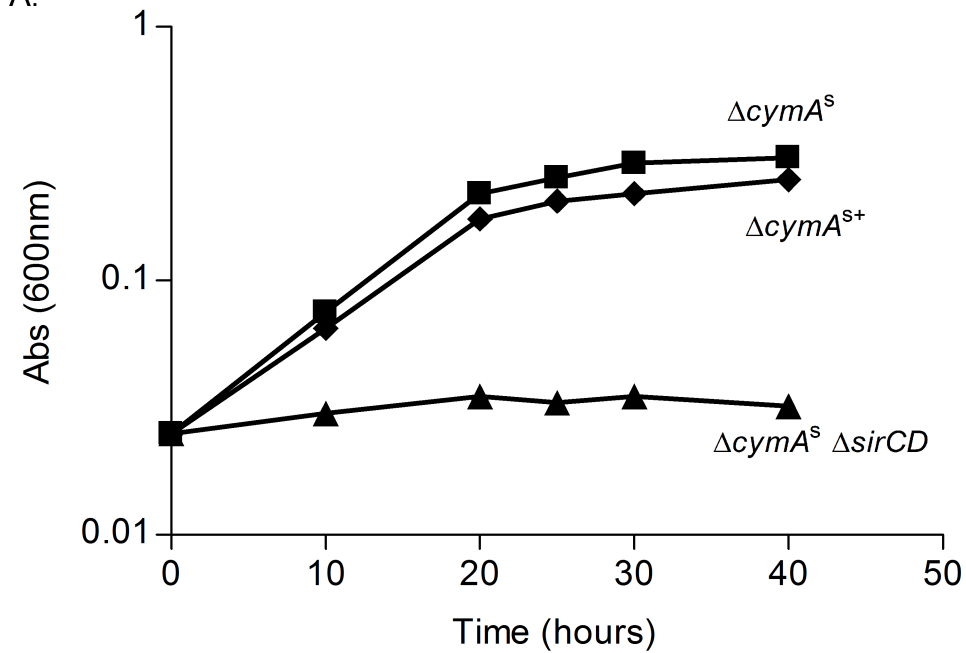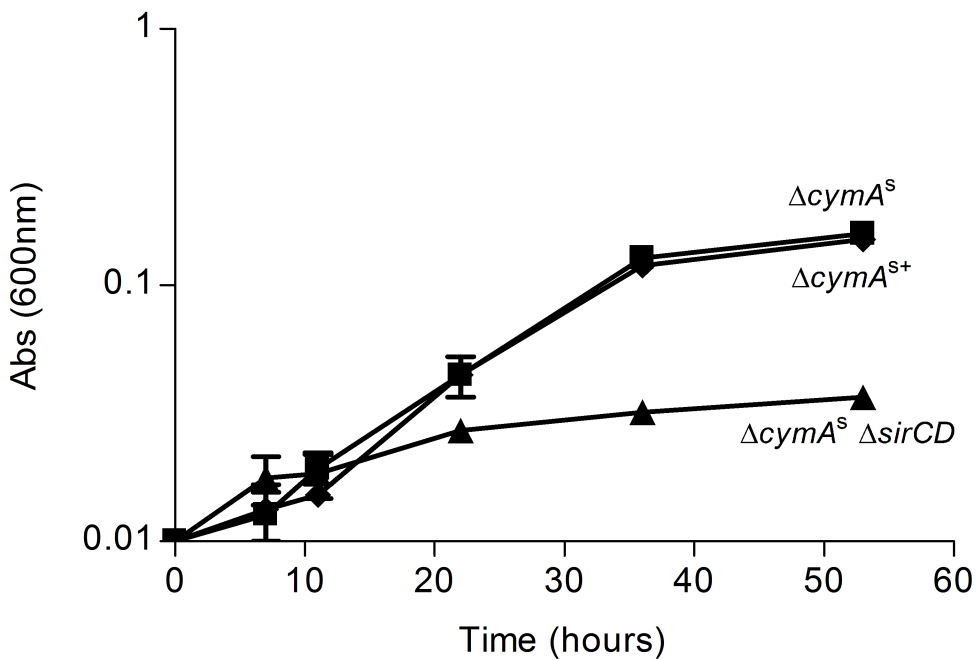

Fig. A1

Supplement: supp_193_9_2312__1.pdf [file supp_193_9_2312__1.pdf]
